# Supplementary material for: Oligomerization and characteristics of phosphoenolpyruvate carboxylase in Synechococcus PCC 7002
Source: PubMed Central journal article supplement (PMC7046716; doi:10.1038/s41598-020-60249-2), 2020-02-27
Supplement: 41598_2020_60249_MOESM1_ESM.pdf [file 41598_2020_60249_MOESM1_ESM.pdf]

Oligomerization and characteristics of phosphoenolpyruvate carboxylase  
in *Synechococcus* PCC 7002

**Oligomerization and characteristics of phosphoenolpyruvate carboxylase  
in *Synechococcus* PCC 7002**

Claudia Durall<sup>a</sup>, Sandesh Kanchugal<sup>b</sup>, Maria Selmer<sup>b</sup> and Peter Lindblad<sup>a\*</sup>

**SUPPLEMENTARY MATERIAL**

**Figure S1**

**Figure S2**

**Table S1**

Oligomerization and characteristics of phosphoenolpyruvate carboxylase  
in *Synechococcus* PCC 7002

**A**

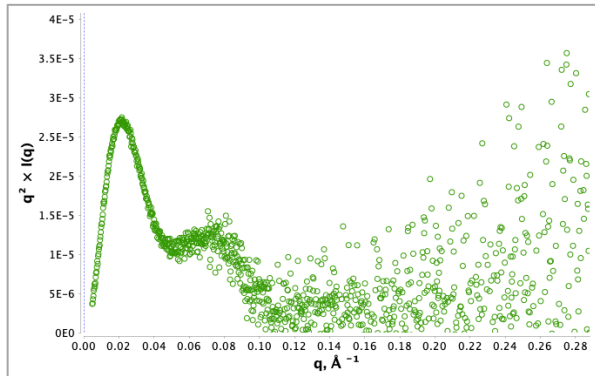

**B**

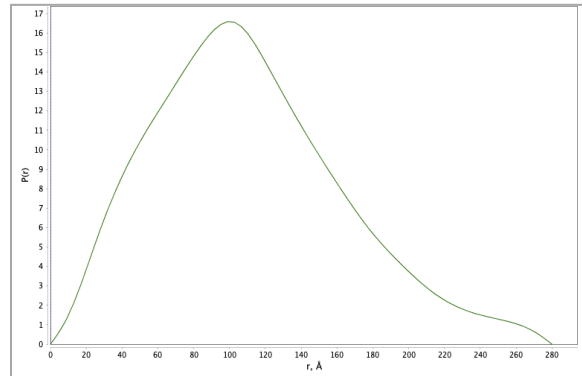

**C**

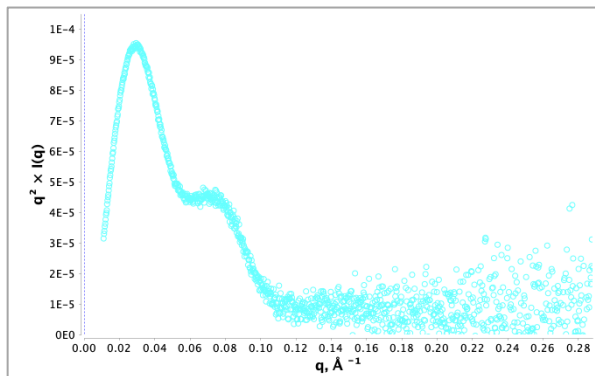

**D**

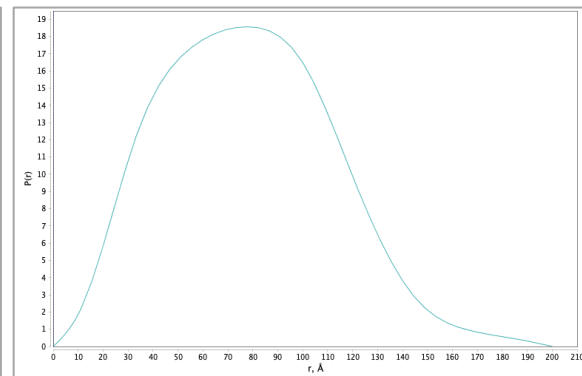

**E**

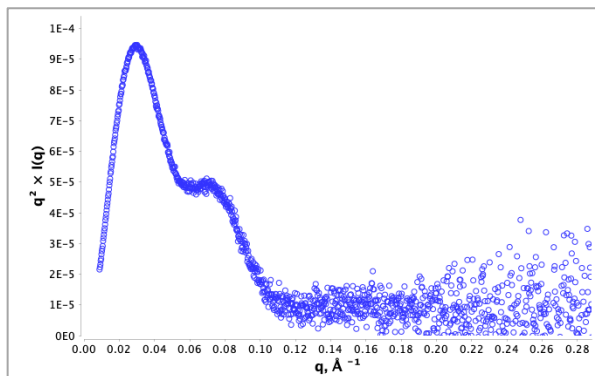

**F**

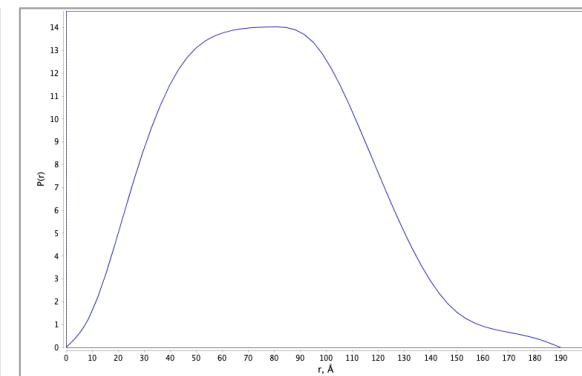

**G**

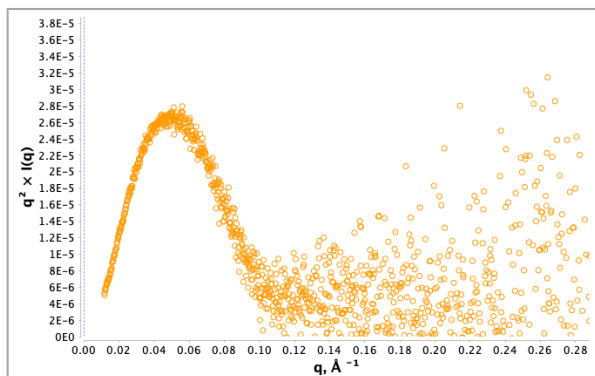

**H**

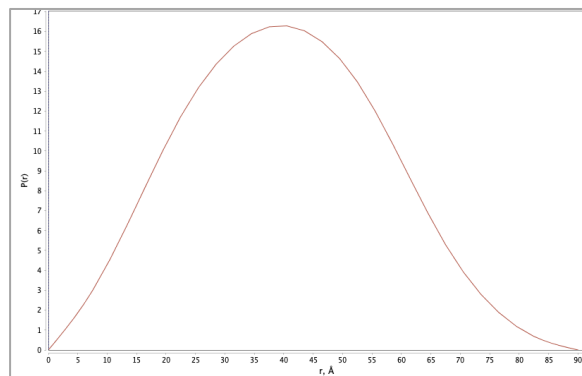

Oligomerization and characteristics of phosphoenolpyruvate carboxylase  
in *Synechococcus* PCC 7002

**Figure S1.** SEC-SAXS data analysis containing Kratky plots and Distance distribution  $P(r)$  for PEPc from Figure 8. The figures are generated from ScÅtter. **A-B.** Peak 1 in TBS with 25 mM  $MgCl_2$  **C-D.** Peak 2 in TBS with 25 mM  $MgCl_2$ . **E-F.** Peak 2 in TBS. **G-H.** Peak 3 in TBS.

Oligomerization and characteristics of phosphoenolpyruvate carboxylase in *Synechococcus* PCC 7002

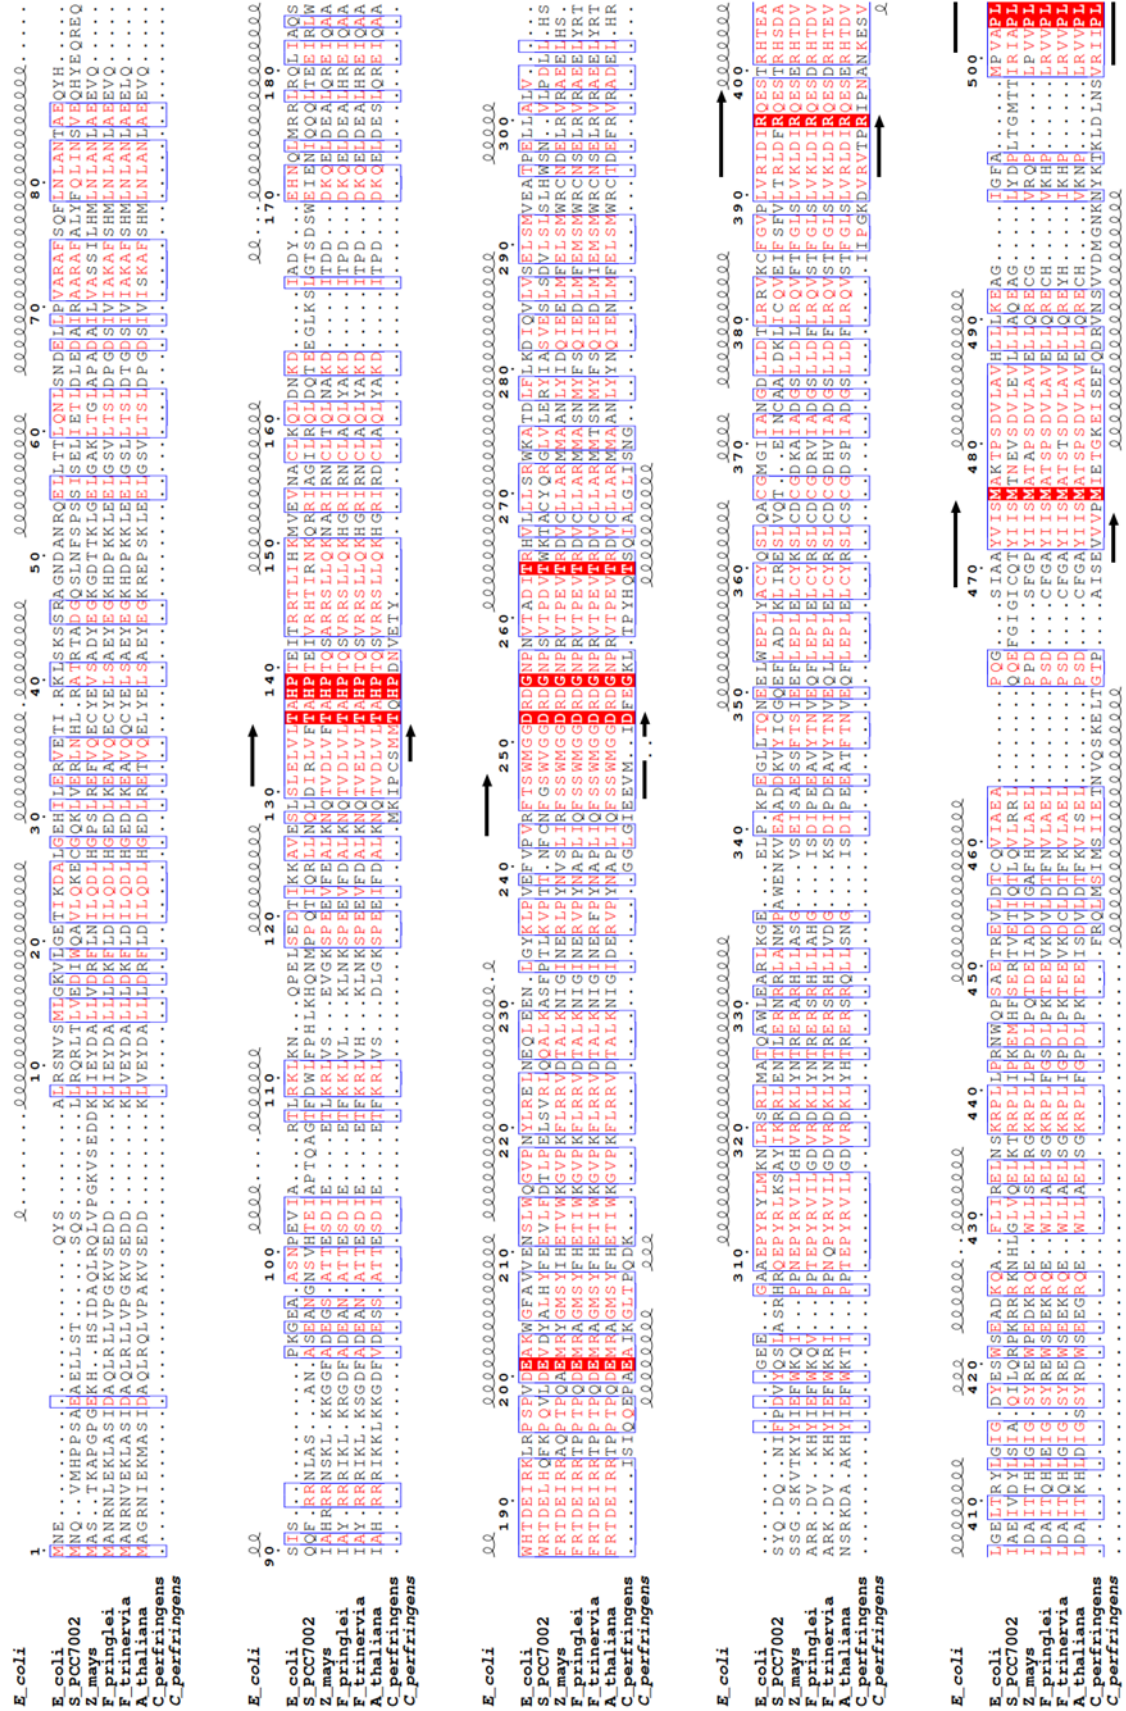



Oligomerization and characteristics of phosphoenolpyruvate carboxylase  
in *Synechococcus* PCC 7002

**Figure S2.** Multiple sequence alignment of PEPc PCC 7002 with PEPc variants with available structures. Above the alignment is shown secondary structure of *E. coli* PEPc from PDB 1FIY and below the alignment the secondary structure of *Clostridium perfringens* PEPc from PDB 3ODM.

Oligomerization and characteristics of phosphoenolpyruvate carboxylase  
in *Synechococcus* PCC 7002

**Table S1.** Comparison of experimental scattering curves with calculated scattering curves generated from available PEPc structures in the PDB using the FOXS server. Best fits for each peak are highlighted in green.

| PDB  | Reference    | Organism                       | Ligand                                              | Oligomeric state*  | R <sub>g</sub> (Å) | χ <sup>2</sup> dimer peak TBS | χ <sup>2</sup> tetramer peak TBS | χ <sup>2</sup> tetramer peak TBS + Mg <sup>2+</sup> |
|------|--------------|--------------------------------|-----------------------------------------------------|--------------------|--------------------|-------------------------------|----------------------------------|-----------------------------------------------------|
| 1FIY | 24           | <i>E. coli</i>                 | Aspartic acid                                       | Tetramer           | 54.7               | 35.7                          | 5.97                             | 5.03                                                |
|      |              |                                |                                                     | Dimer              | 40.2               | 1.48                          | 581                              | 499                                                 |
| 1JQN | 25           | <i>E. coli</i>                 | Mn <sup>2+</sup> , DCDP, aspartic acid              | Tetramer           | 54.8               | 36.3                          | 5.99                             | 5.63                                                |
|      |              |                                |                                                     | Dimer              | 40.5               | 1.47                          | 523                              | 453                                                 |
| 1JQO | 25           | <i>Zea mays</i>                | Sulfate                                             | Tetramer           | 55.2               | 30.5                          | 7.18                             | 8.06                                                |
|      |              |                                |                                                     | Dimer              | 40.0               | 1.61                          | 628                              | 537                                                 |
| 1QB4 | 45           | <i>E. coli</i>                 | Mn <sup>2+</sup> , aspartic acid                    | Tetramer           | 54.8               | 35.8                          | 5.56                             | 5.39                                                |
|      |              |                                |                                                     | Dimer              | 40.2               | 1.47                          | 594                              | 510                                                 |
| 3ODM | 46           | <i>Clostridium perfringens</i> | Malonate, gold cyanide                              | Tetramer           | 43.5               | 9.11                          | 332                              | 287                                                 |
|      |              |                                |                                                     | Dimer              | 33.6               | 4.85                          | 1253                             | 1044                                                |
| 3ZGB | 47           | <i>Flaveria pringlei</i>       | Sulfate, ethylene glycol, aspartic acid             | Tetramer           | 49.3               | 26.5                          | 103                              | 82.8                                                |
|      |              |                                |                                                     | Dimer              | 40.0               | 1.55                          | 628                              | 537                                                 |
| 3ZGE | 47           | <i>Flaveria trinervia</i>      | Sulfate, ethylene glycol, aspartic acid             | Tetramer           | 49.2               | 26.9                          | 104                              | 83.3                                                |
|      |              |                                |                                                     | Dimer              | 40.0               | 1.52                          | 619                              | 530                                                 |
| 4BXC | 48           | <i>Flaveria trinervia</i>      | Sulfate, glucose-6-phosphate, ethylene glycol, Tris | Tetramer           | 49.3               | 27.3                          | 105                              | 83.9                                                |
|      |              |                                |                                                     | Dimer              | 39.9               | 1.56                          | 621                              | 531                                                 |
| 4BXH | 48           | <i>Flaveria trinervia</i>      | Sulfate, ethylene glycol                            | Tetramer           | 49.3               | 27.7                          | 103                              | 83.0                                                |
|      |              |                                |                                                     | Dimer              | 40.0               | 1.56                          | 623                              | 532                                                 |
| 5FDN | Un-published | <i>Arabidopsis thaliana</i>    | Citrate, aspartic acid                              | Dimer <sup>#</sup> | 39.9               | 1.55                          | 634                              | 542                                                 |
| 5VYJ | 49           | <i>Zea mays</i>                | Glycine, acetate                                    | Tetramer           | 53.5               | 32.4                          | 22.7                             | 19.36                                               |
|      |              |                                |                                                     | Dimer              | 40.2               | 1.62                          | 563                              | 484                                                 |

\* Oligomers generated from crystal packing

<sup>#</sup> No symmetric tetramer in crystal packing

REFERENCES

24. Kai, Y., Matsumura, H., Inoue, T., Terada, K., Nagara, Y., Yoshinaga, T., Kihara, A., Tsumura, K., Izui, K. (1999) Three-dimensional structure of phosphoenolpyruvate carboxylase: a proposed mechanism for allosteric inhibition. *Proc. Natl. Acad. Sci.* 96, 823-828.
25. Matsumura, H., Xie, Y., Shirakata, S., Inoue, T., Yoshinaga, T., Ueno, Y., Ueno Y, Izui K, Kai, Y. (2002) Crystal structures of C4 form maize and quaternary complex of *E. coli* phosphoenolpyruvate carboxylases. *Structure* 10, 1721-1730.
45. Matsumura, H., Terada, M., Shirakata, S., Inoue, T., Yoshinaga, T., Izui, K., Kai, Y. (1999) Plausible phosphoenolpyruvate binding site revealed by 2.6 Å structure of Mn<sup>2+</sup>-bound phosphoenolpyruvate carboxylase from *Escherichia coli*. *FEBS Lett.* 458, 93-96.
46. Dharmarajan, L., Kraszewski, J. L., Mukhopadhyay, B., Dunten, P. W. (2011) Structure of an archaeal-type phosphoenolpyruvate carboxylase sensitive to inhibition by aspartate. *Proteins: Struct. Funct. Bioinf.* 79, 1820-1829.
47. Paulus, J. K., Schlieper, D., Groth, G. (2013) Greater efficiency of photosynthetic carbon fixation due to single amino-acid substitution. *Nat. Commun.* 4, 1518.
48. Schlieper, D., Förster, K., Paulus, J. K., Groth, G. (2014) Resolving the activation site of positive regulators in plant phosphoenolpyruvate carboxylase. *Mol. Plant* 7, 437-440.
49. González-Segura, L., Mújica-Jiménez, C., Juárez-Díaz, J. A., Gúmez-Toro, R., Martínez-Castilla, L. P., Muñoz-Clares, R. A. (2018) Identification of the allosteric site for neutral amino acids in the maize C4 isozyme of phosphoenolpyruvate carboxylase: The critical role of Ser-100. *J. Biol. Chem.* 293, 9945-9957.
